# Supplementary material for: Pathway profiling of a novel SRC inhibitor, AZD0424, in combination with MEK inhibitors for cancer treatment
Source: PubMed Central journal article supplement (PMC8895456; doi:10.1002/1878-0261.13151), 2021-12-18
Supplement: MOL2-16-1072-s005.pdf [file MOL2-16-1072-s005.pdf]

**A**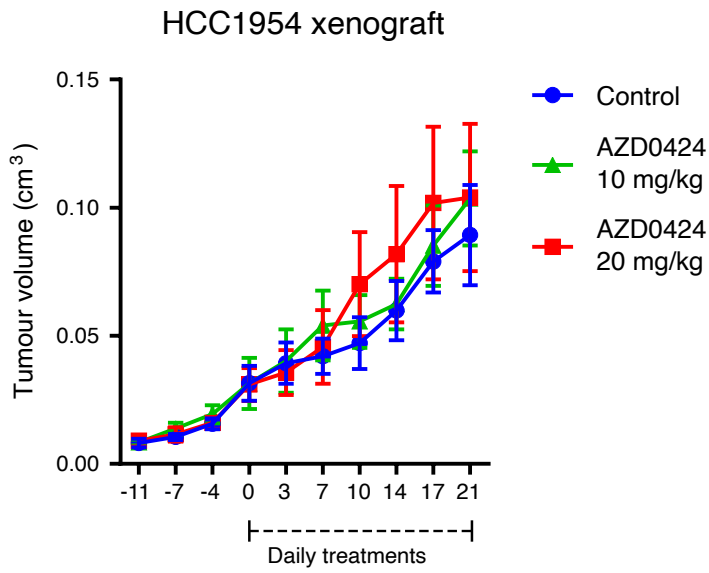**B**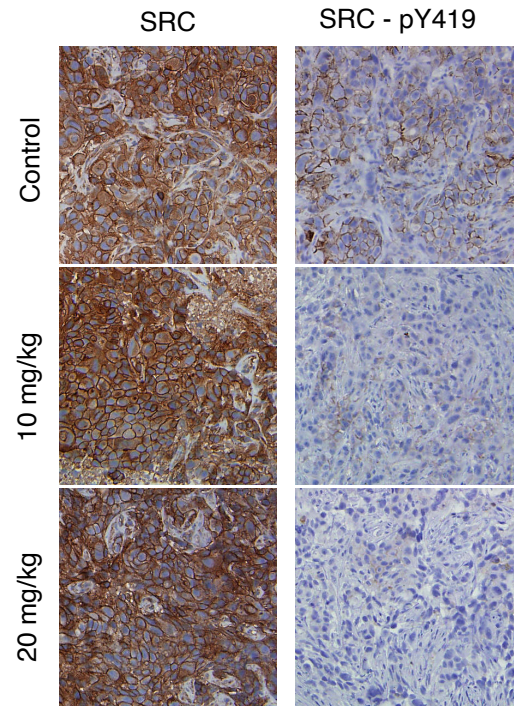

Supplementary Figure 1. AZD0424 inhibits the activation of SRC in vivo. (A), AZD0424 does not inhibit tumour growth of HCC1954 tumours. Tumour volumes are plotted as means  $\pm$  SEM [ $n \geq 4$  mice per group (2 tumours per mouse)]. (B), Immunohistochemical analysis of phosphorylated SRC Tyr419 in HCC1954 tumours taken from mice treated with AZD0424.
