# Supplementary material for: Pathway profiling of a novel SRC inhibitor, AZD0424, in combination with MEK inhibitors for cancer treatment
Source: PubMed Central journal article supplement (PMC8895456; doi:10.1002/1878-0261.13151), 2021-12-18
Supplement: MOL2-16-1072-s006.pdf [file MOL2-16-1072-s006.pdf]

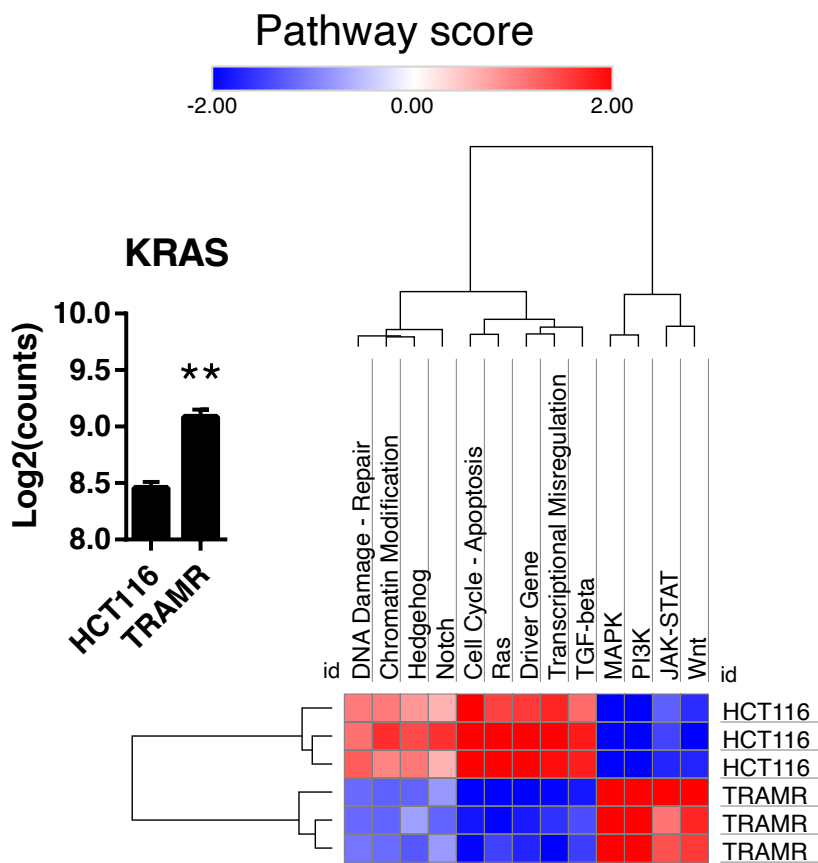

Supplementary Figure 4. MAPK signalling is overactivated in trametinib resistant cells. RNA from HCT116 and trametinib resistant TRAMR cells was analysed using a NanoString PanCancer Pathway panel. Inset bar chart shows the expression of KRAS gene. Mean cell expression is shown  $\pm$  SEM ( $n = 3$  independent experiments). \*\*,  $p < 0.01$  (t-test).
